# Supplementary material
Source: Springer Nature journal article supplement (https://www.springermedizin.de/resource/supplementary/12887_2012_702_MOESM1_ESM.pdf/9475522)
Supplement: MOESM1 [file 9475522]

UC Patients  
(N=54)

```
graph TD; A[UC Patients (N=54)] --> B[Patients with no disease progression (N=33)]; A --> C[Patients with disease progression (N=22)];
```

Patients with no  
disease progression  
(N = 33)  
Pancolitis=29  
Distal colitis=2  
Proctitis=2

Patients with  
disease progression  
(N = 22)  
Pancolitis=12  
Distal colitis=6  
Proctitis=6
